# Supplementary material for: p-Sulfonic acid calix[n]arenes: the most active and water tolerant organocatalysts in esterification reactions
Source: Royal Society of Chemistry journal article supplement (doi:10.1039/c3cy01081c), 2014-01-01
Supplement: c3cy01081c1.pdf [file c3cy01081c1.pdf]

## Supplementary Information

### ***p*-Sulfonic acid calix[*n*]arenes: the most active and water tolerant organocatalysts in esterification reactions**

Ricardo Natalino, Eduardo V. V. Varejão, Márcio J. da Silva, Abiney L. Cardoso and

Sergio A. Fernandes

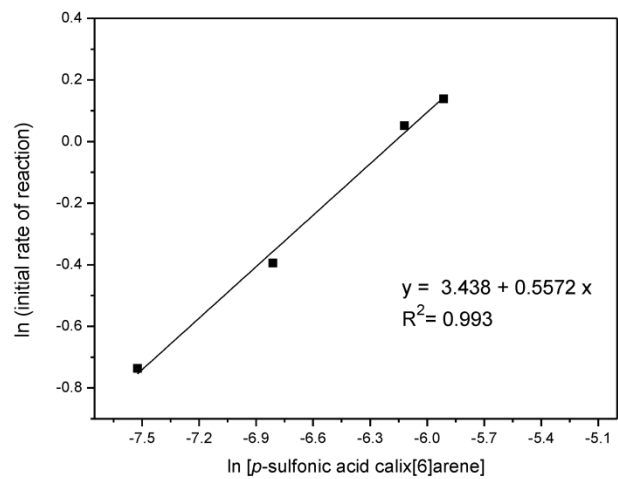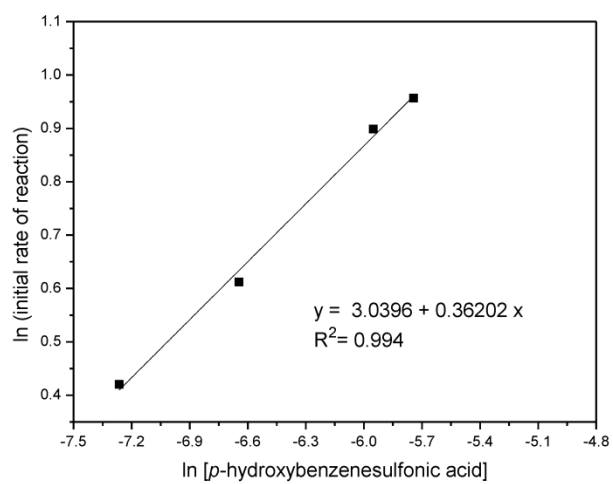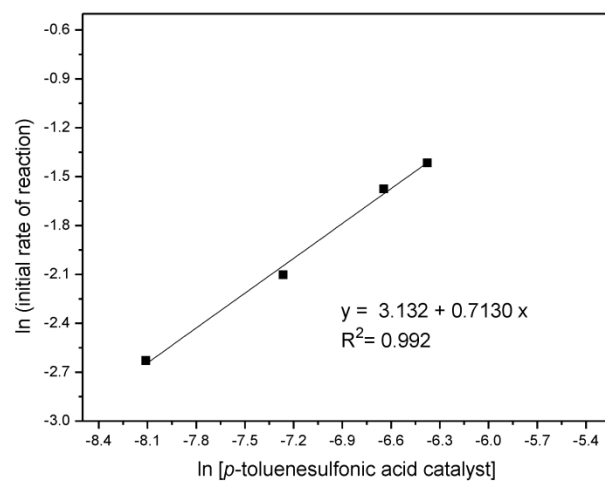

Figure S1 Order of reaction with respect to the sulfonic acid catalyst concentration.

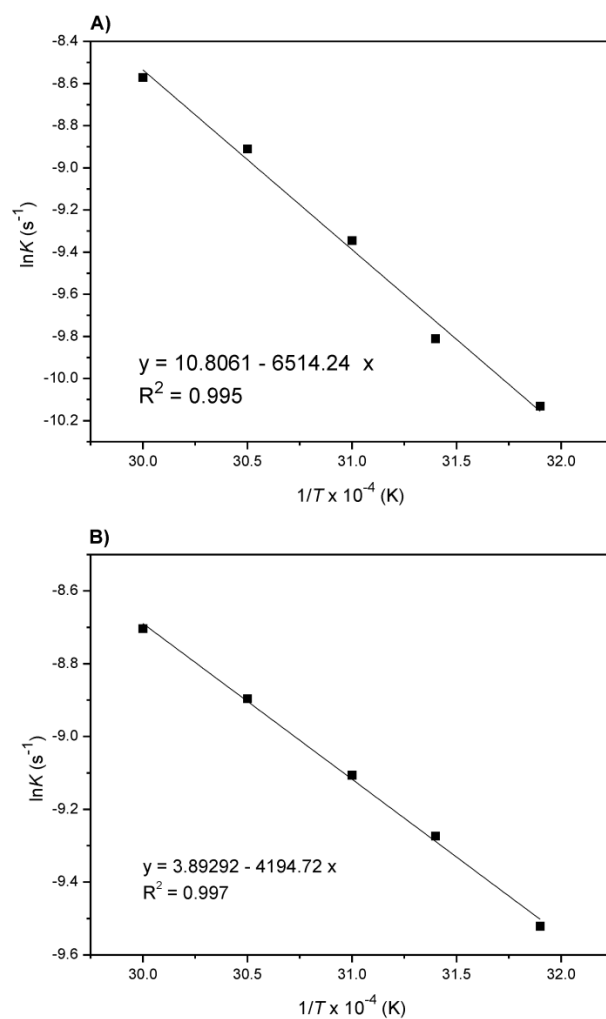

Figure S2 Arrhenius plots of the palmitic acid esterification reactions with deuterated methanol at temperatures ca. 313-333 K. **A)** *p*-sulfonic acid calix[6]arene (**I**) and **B)** *p*-hydroxybenzenesulfonic acid (**II**).

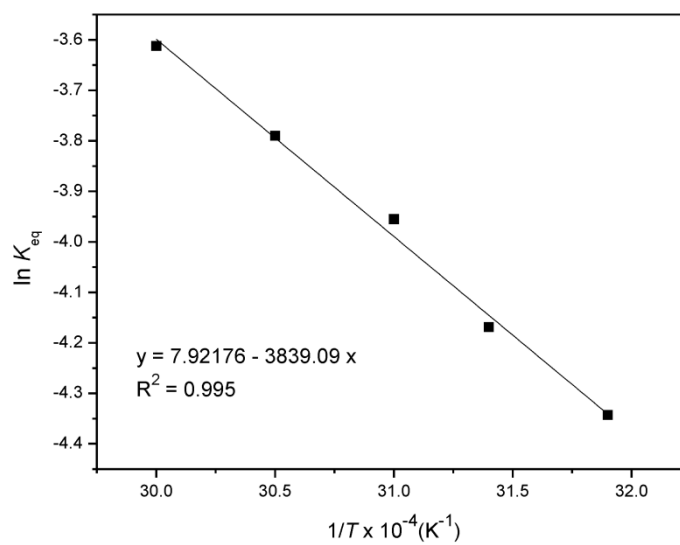

Figure S3 Linear plots of  $\ln K_{eq}$  versus  $1/T$  for the *p*-sulfonic acid calix[6]arene (**II**) catalyzed palmitic acid esterification with  $\text{CD}_3\text{OD}$ .
